# Supplementary material
Source: Springer Nature journal article supplement (https://www.springermedizin.de/resource/supplementary/13048_2014_269_MOESM1_ESM.pdf/9665268)
Supplement: MOESM1 [file 9665268]

Citations identified in MEDLINE using the keyword search terms “ovarian cancer” and/or “laparoscopy” and/or “fertility –sparing” (n=354)

References irrelevant to study purpose after scanning title and abstract (n=334)

Studies retrieved for more detailed evaluation (n=20)

Excluded (n=15)

- Series including laparoscopic complete staging only (n=7)
- Patients with borderline tumors non separable from those with invasive cancer (n=2)
- Patients undergoing fertility-sparing surgery non separable from other laparoscopically managed EOC patients who had complete staging (n=3)
- Patients undergoing laparoscopic staging non separable from those undergoing open surgery (n=3)

Studies included in the review (n=5)
